# Supplementary material for: LncRNA HOTAIR promotes MPP+-induced neuronal injury in Parkinson’s disease by regulating the miR-874-5p/ATG10 axis
Source: PubMed Central journal article supplement (PMC7527508; doi:10.17179/excli2020-2286), 2020-08-05

**Original article:**

**lncRNA HOTAIR PROMOTES MPP<sup>+</sup>-INDUCED NEURONAL INJURY  
IN PARKINSON'S DISEASE BY REGULATING THE  
MIR-874-5P/ATG10 AXIS**

Jingya Zhao, Hongli Li, Na Chang\*

Department of Neurology, Huaihe Hospital of Henan University, Kaifeng 475000, Henan, China

\* **Corresponding author:** Na Chang, Department of Neurology, Huaihe Hospital of Henan University, No. 115 Ximen Street, Kaifeng 475000, Henan, China.  
Tel: +86-0371-23906530. E-mail: [changnachang1@163.com](mailto:changnachang1@163.com)

<http://dx.doi.org/10.17179/excli2020-2286>

This is an Open Access article distributed under the terms of the Creative Commons Attribution License (<http://creativecommons.org/licenses/by/4.0/>).

Figure 2D

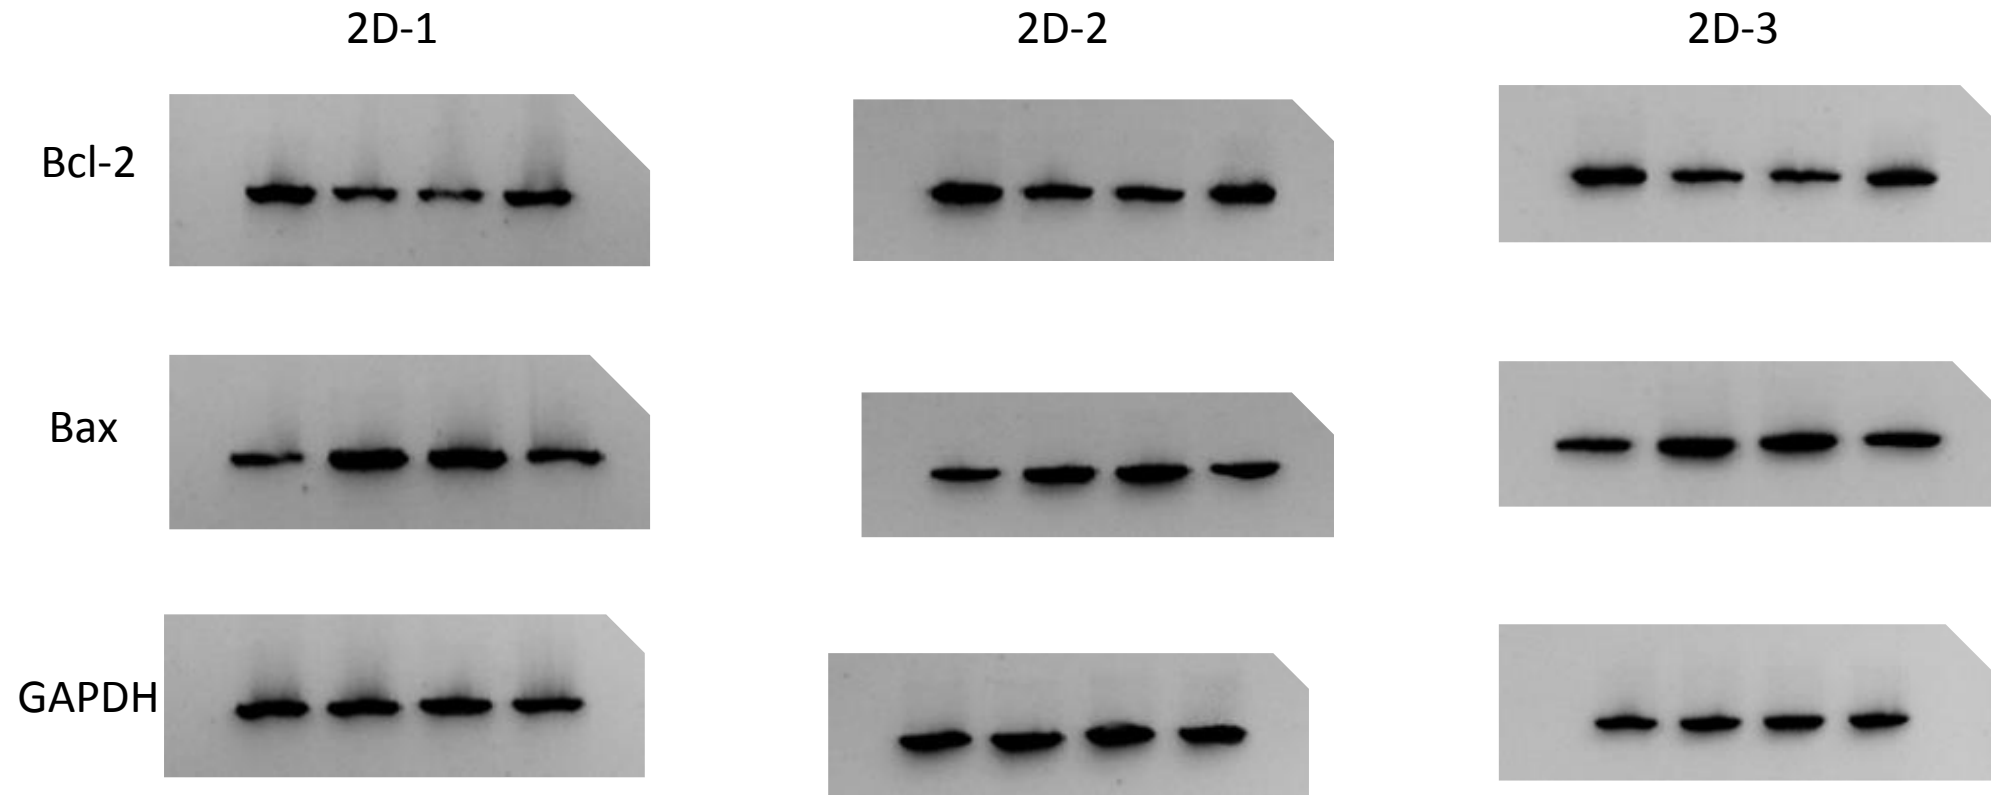

Figure 4D

4D-1

4D-2

4D-3

Bcl-2

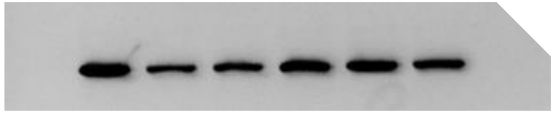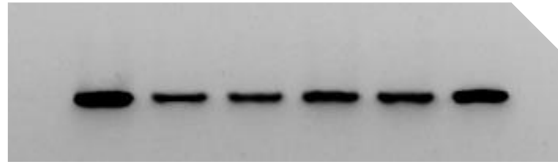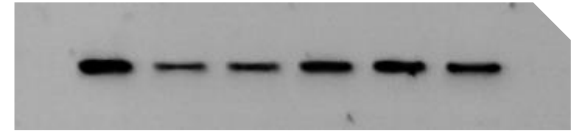

Bax

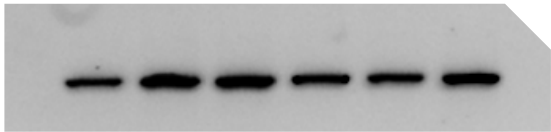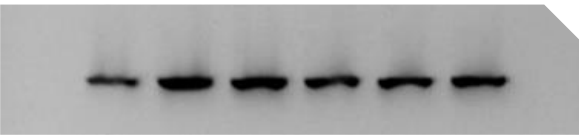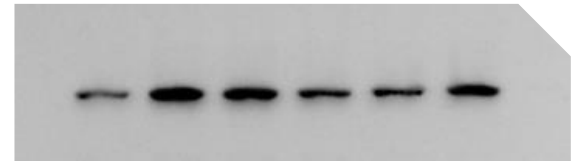

GAPDH

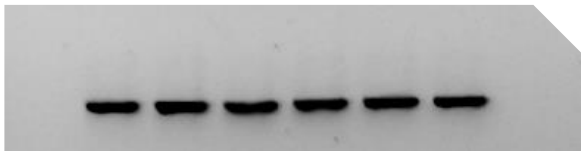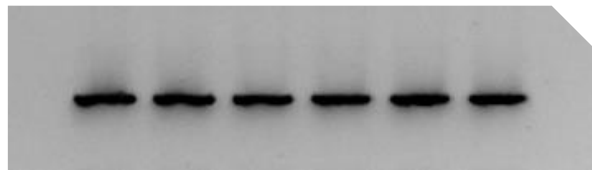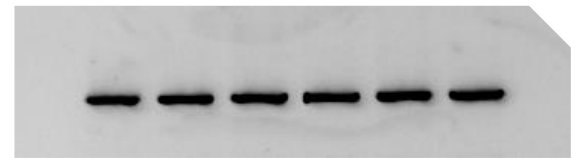

Figure 5D

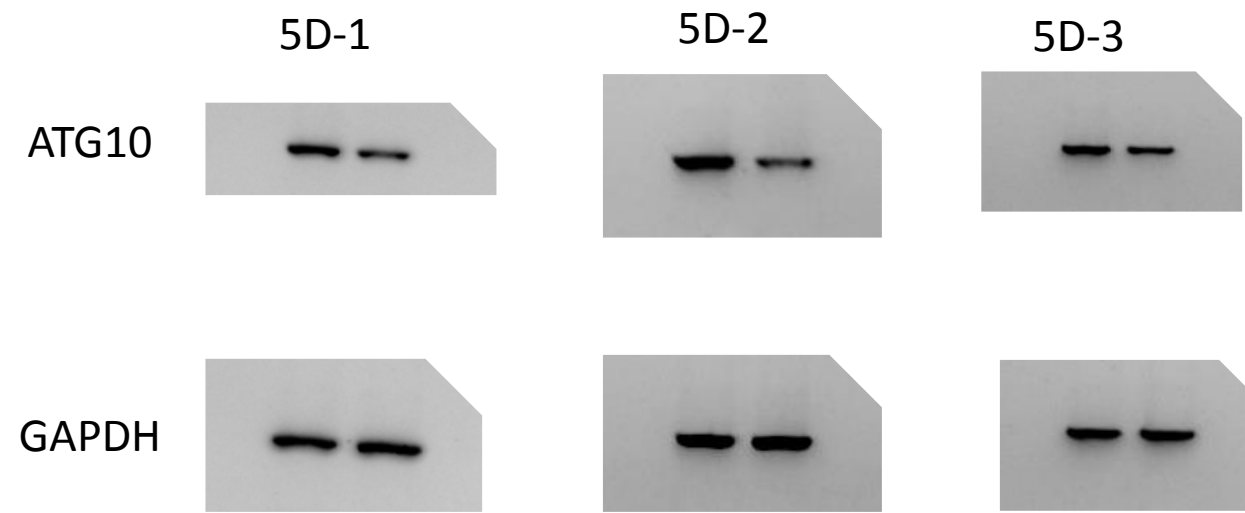

Figure 5F

5F-1

5F-2

5F-3

ATG10

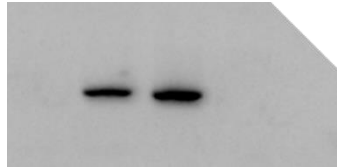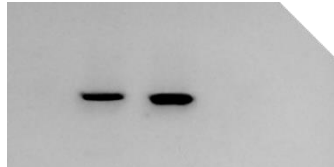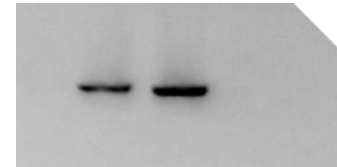

GAPDH

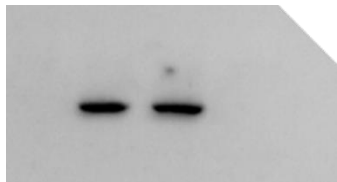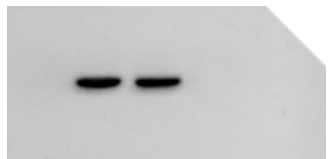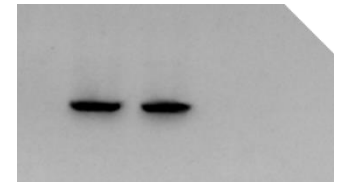

Figure 5H

5H-1

5H-2

5H-3

ATG10

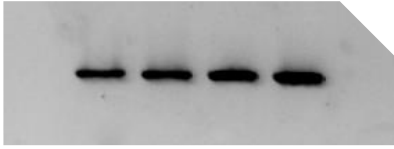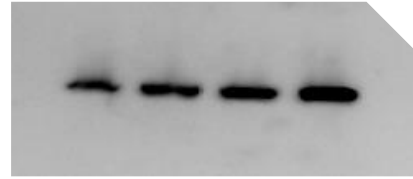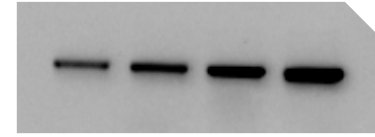

GAPDH

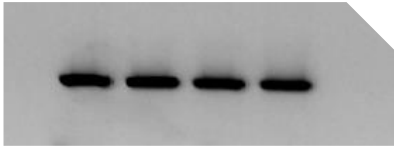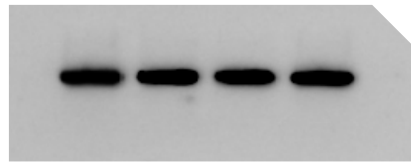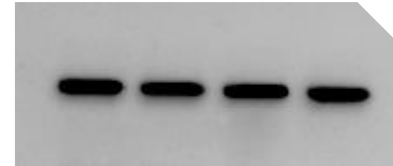

Figure 6B

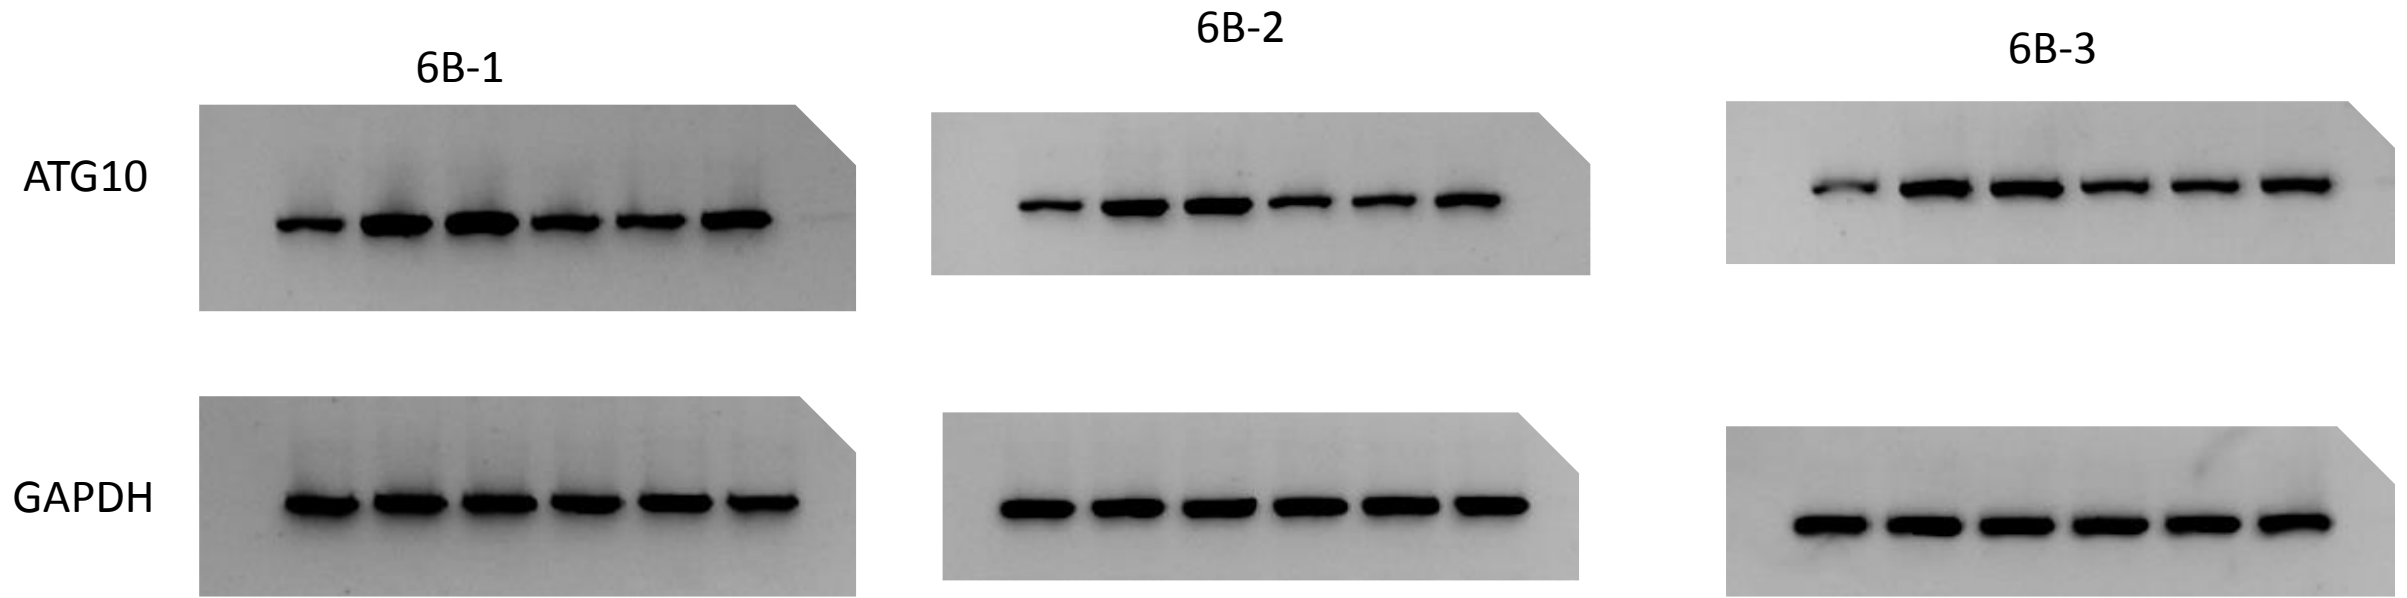

Figure 6E

6E-1

6E-2

6E-3

Bcl-2

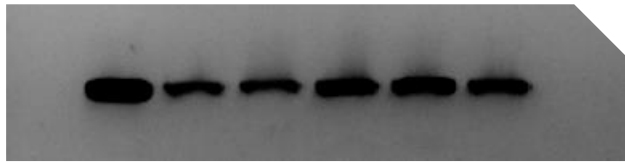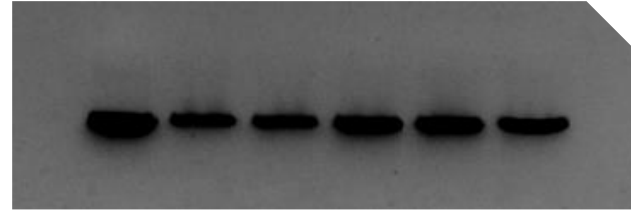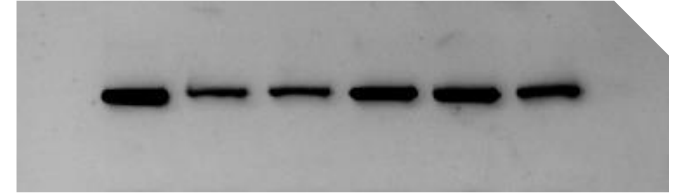

Bax

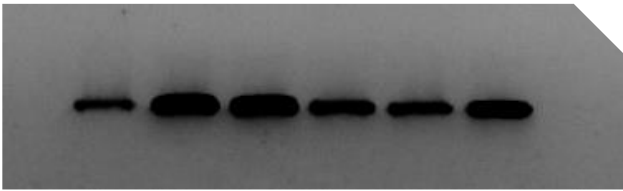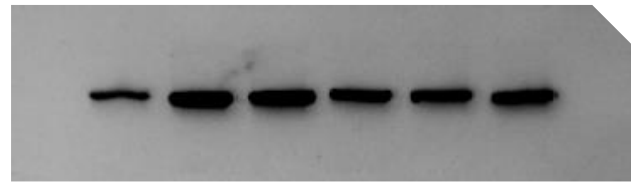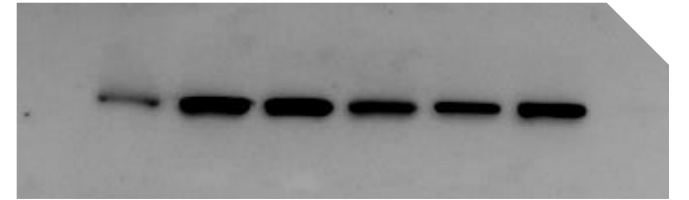

GAPDH

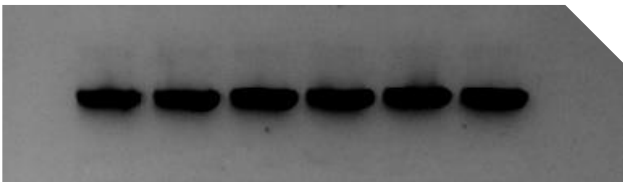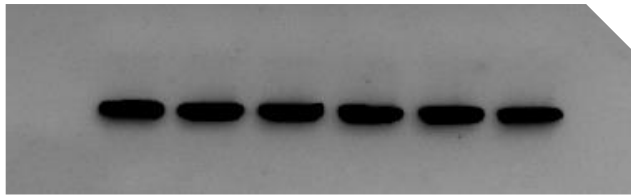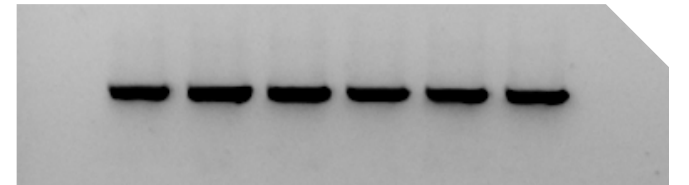



Figure 7B

7B-1

7B-2

7B-3

ATG10

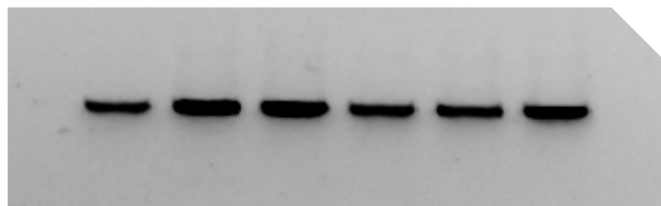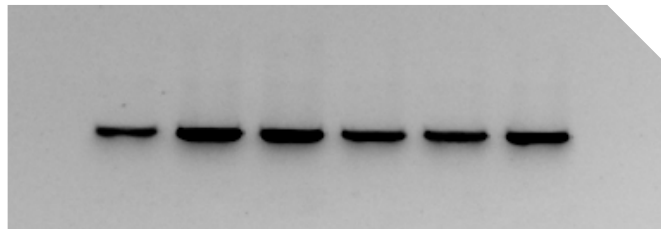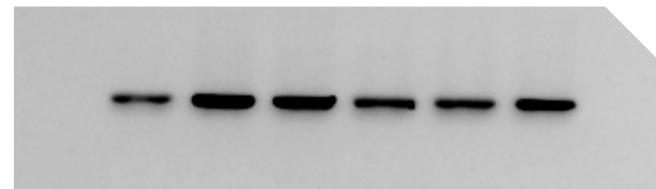

GAPDH

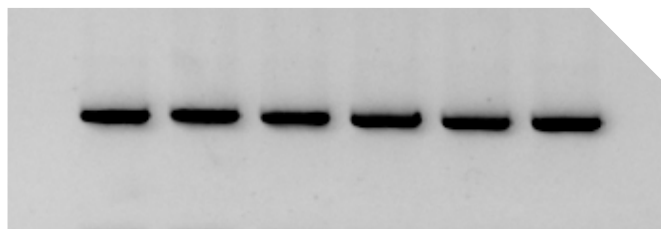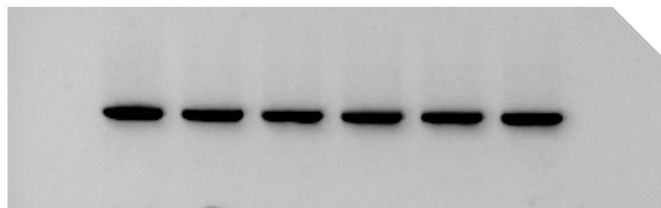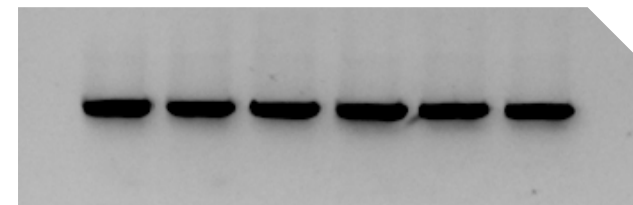

Supplement: EXCLI-19-1141-s-001.pdf [file EXCLI-19-1141-s-001.pdf]
